# Supplementary material
Source: ML conference proceedings conference paper supplement (https://openreview.net/forum?id=99rVbG1iJM)

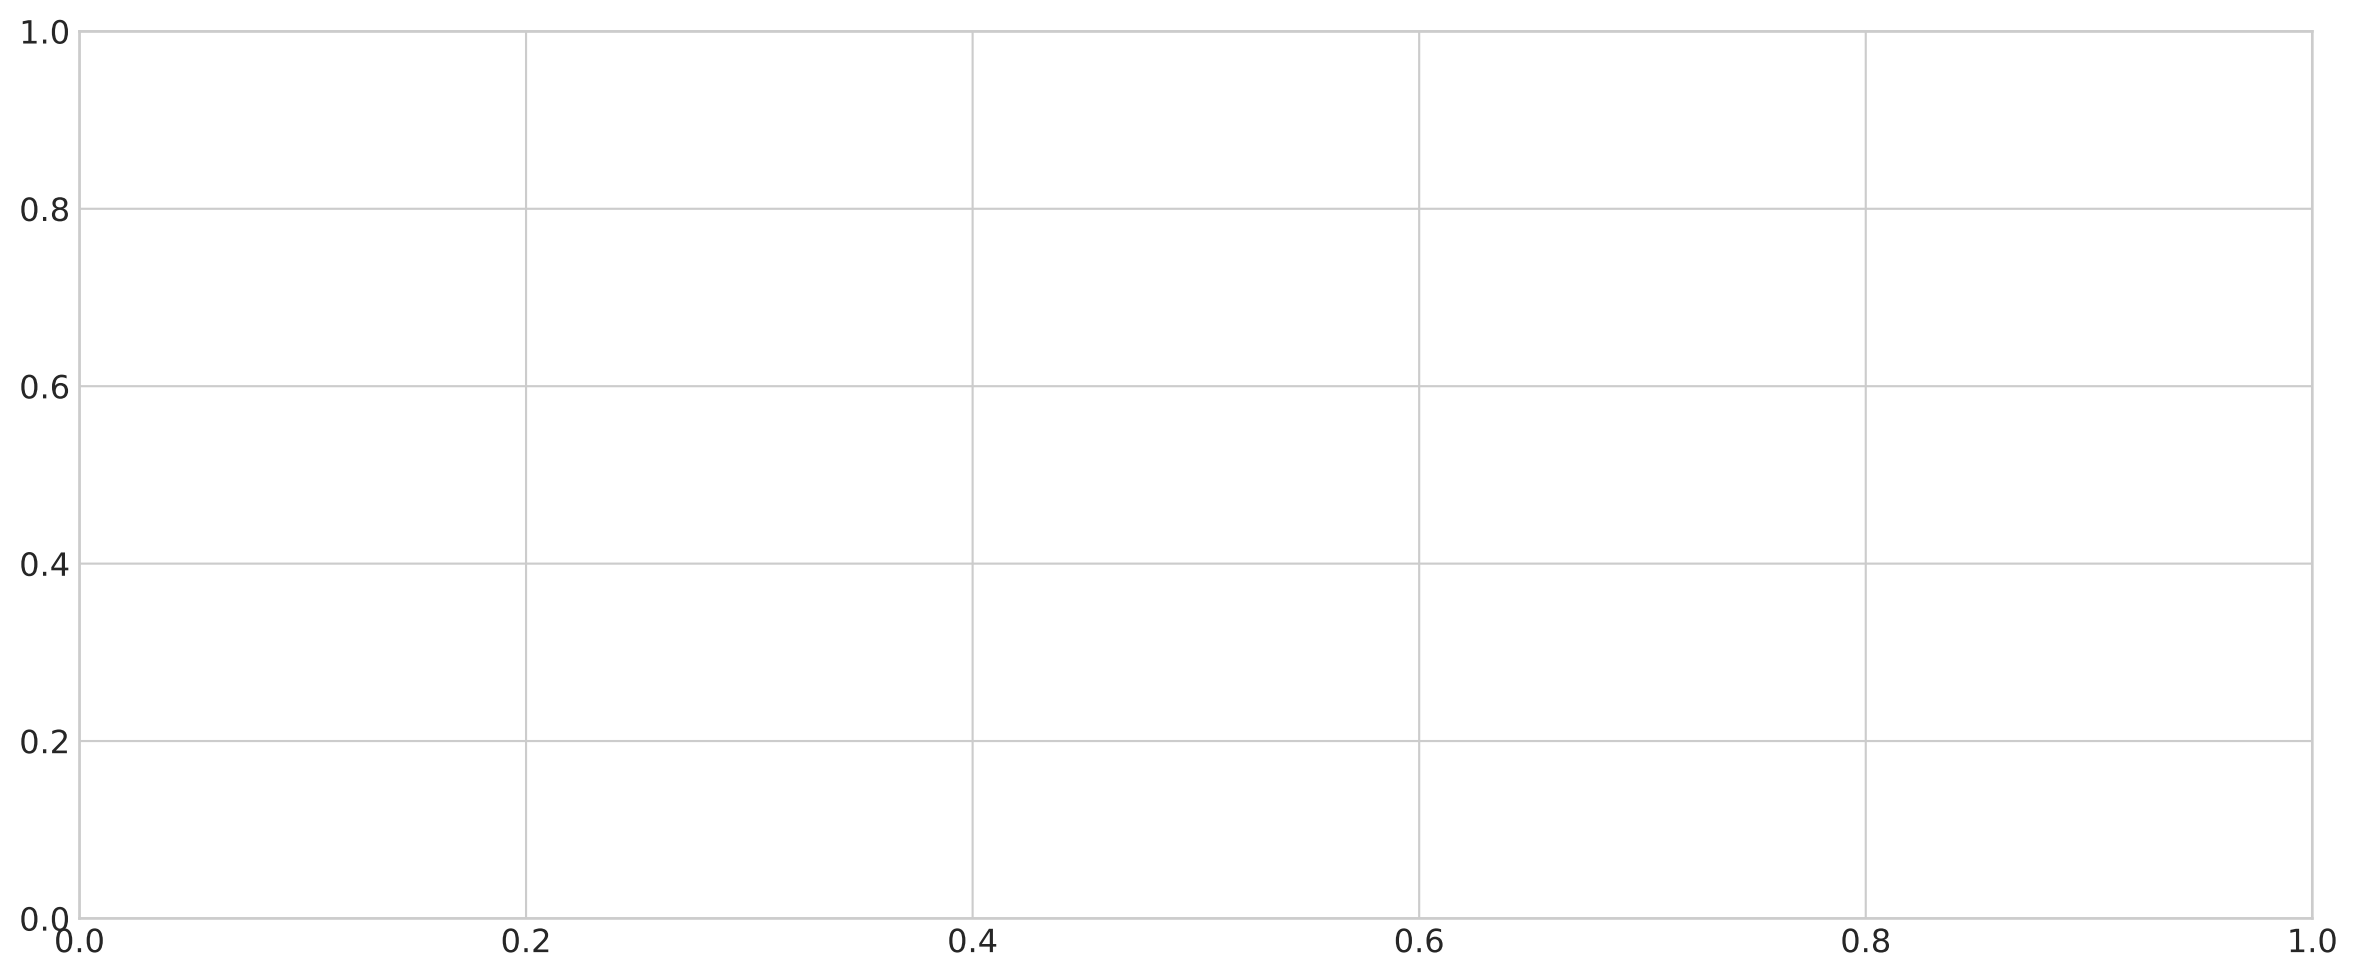

Supplement: supplementary_material [file attachment]

## Unichain $L = 50$

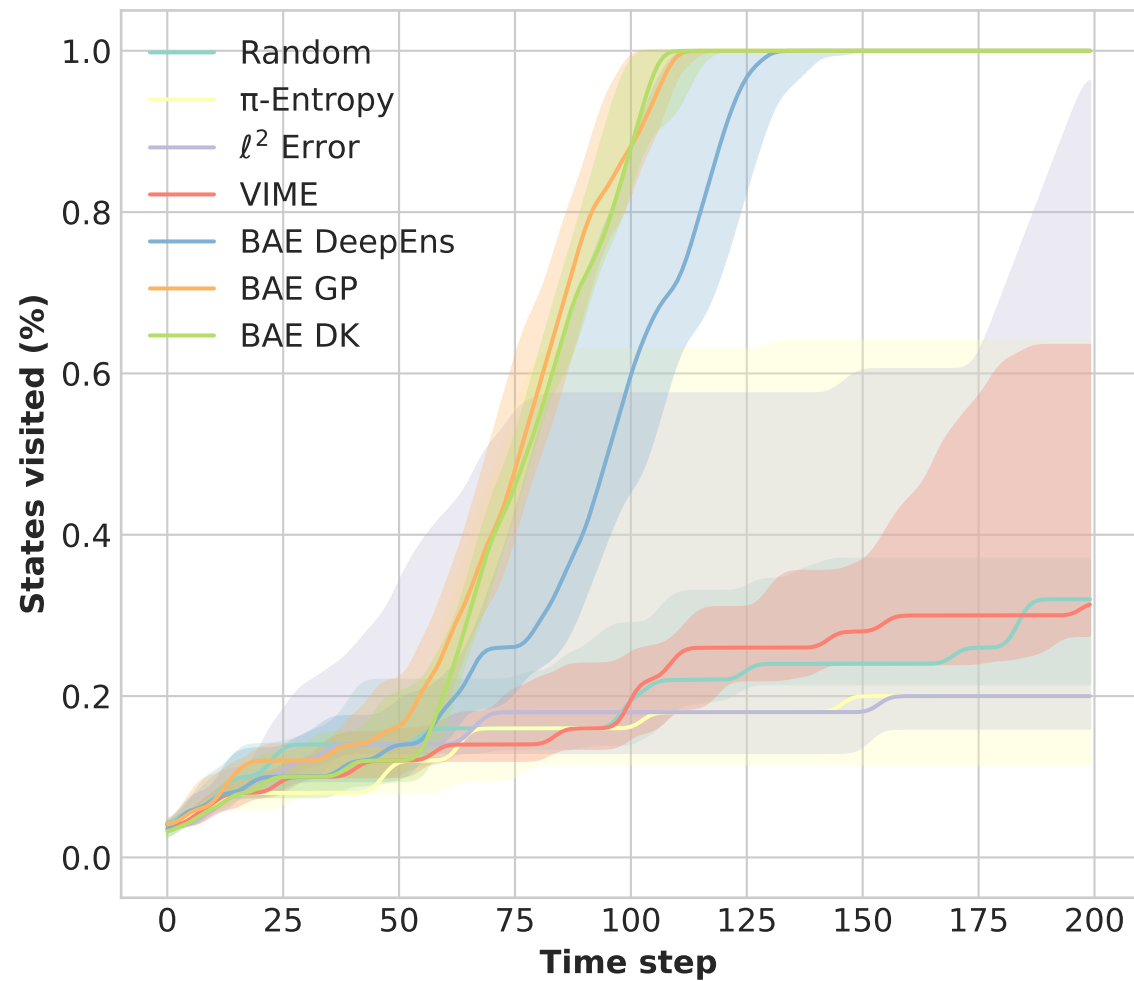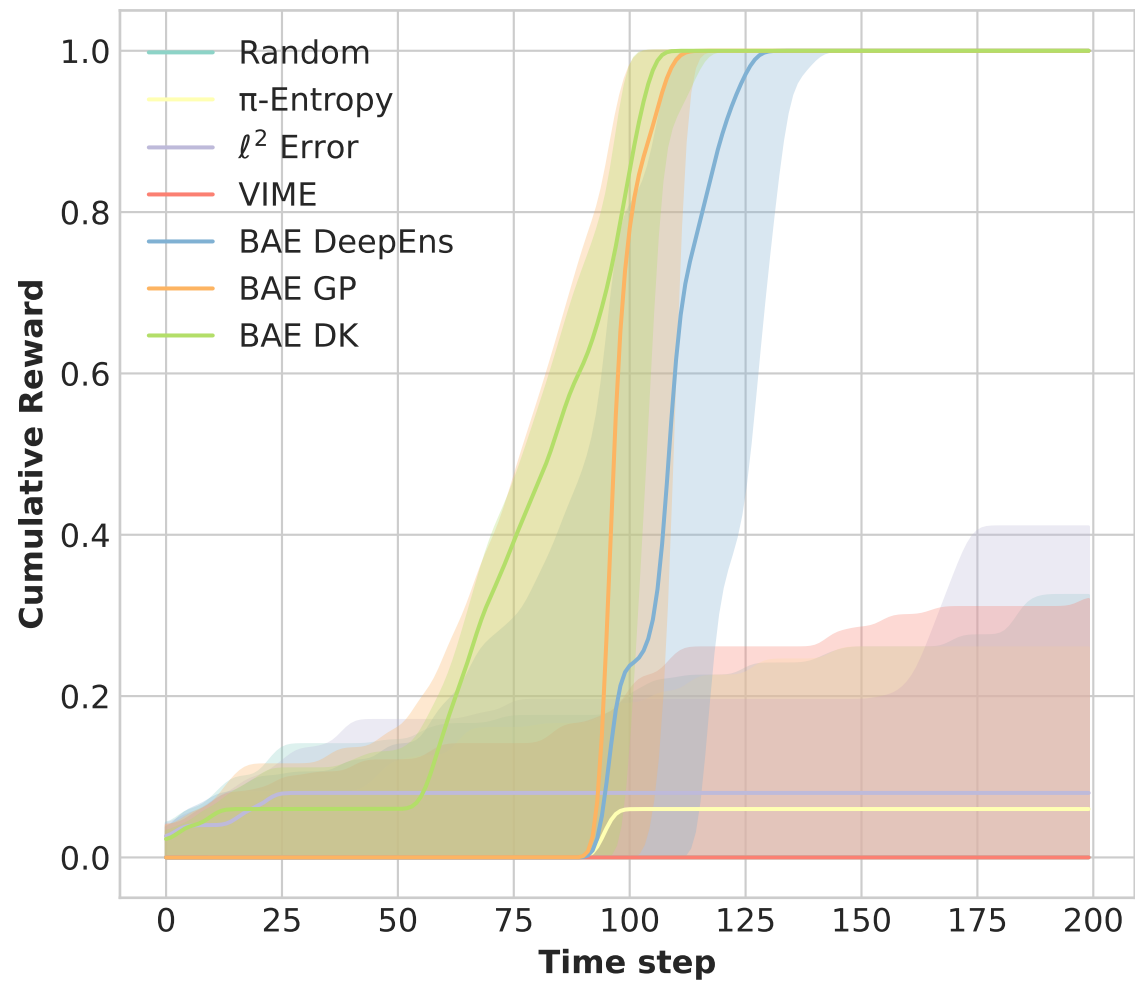

Supplement: supplementary_material [file attachment]

# U-Maze

## Reactive

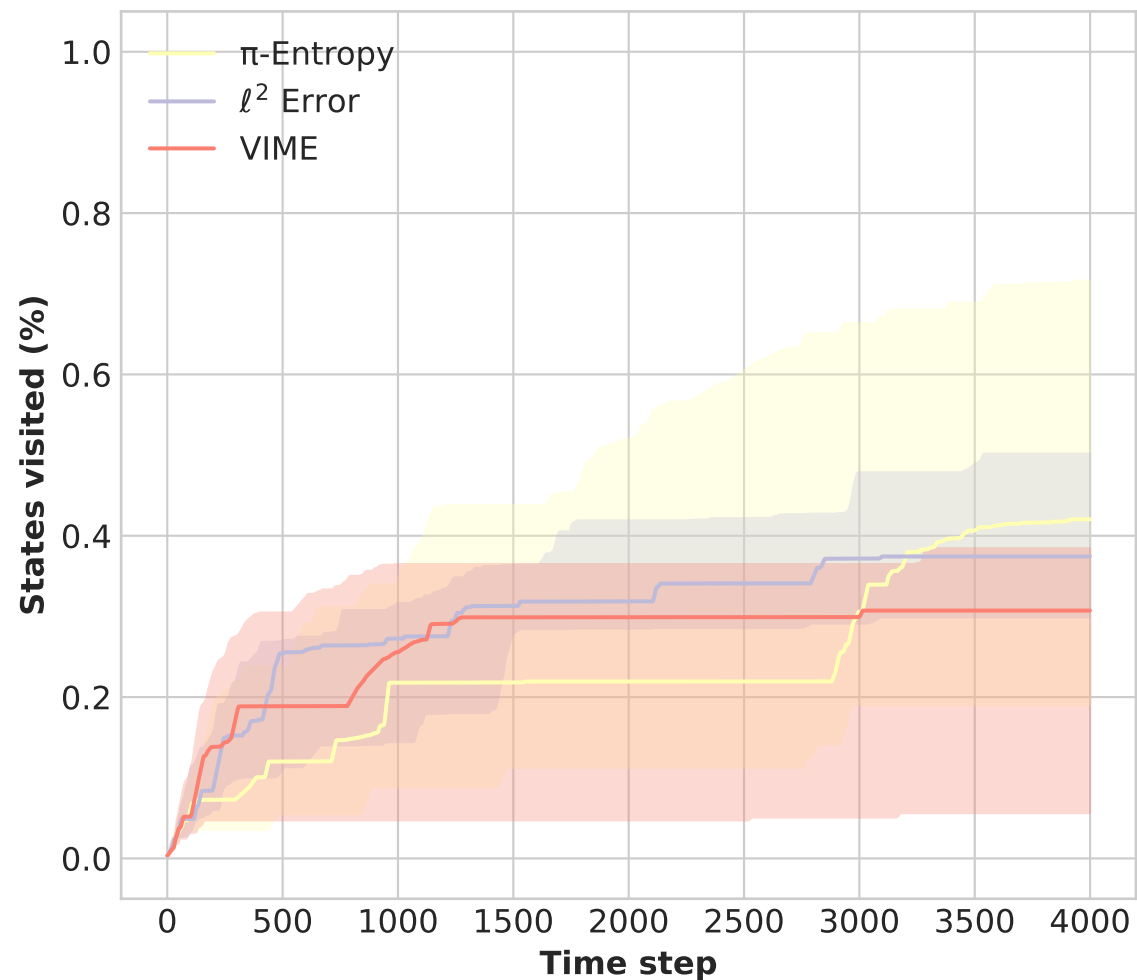

## Active

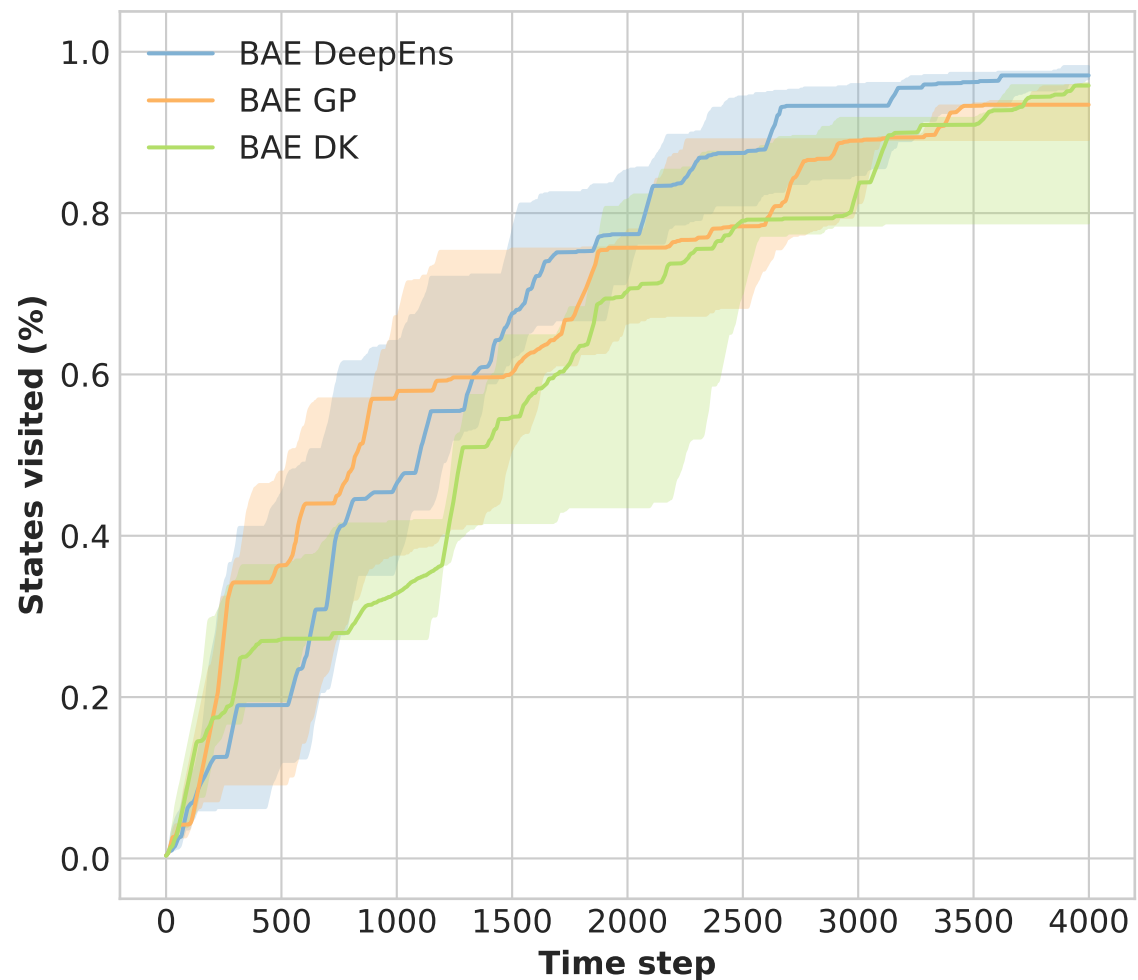

Supplement: supplementary_material [file attachment]

# Mountain Car

## Reactive

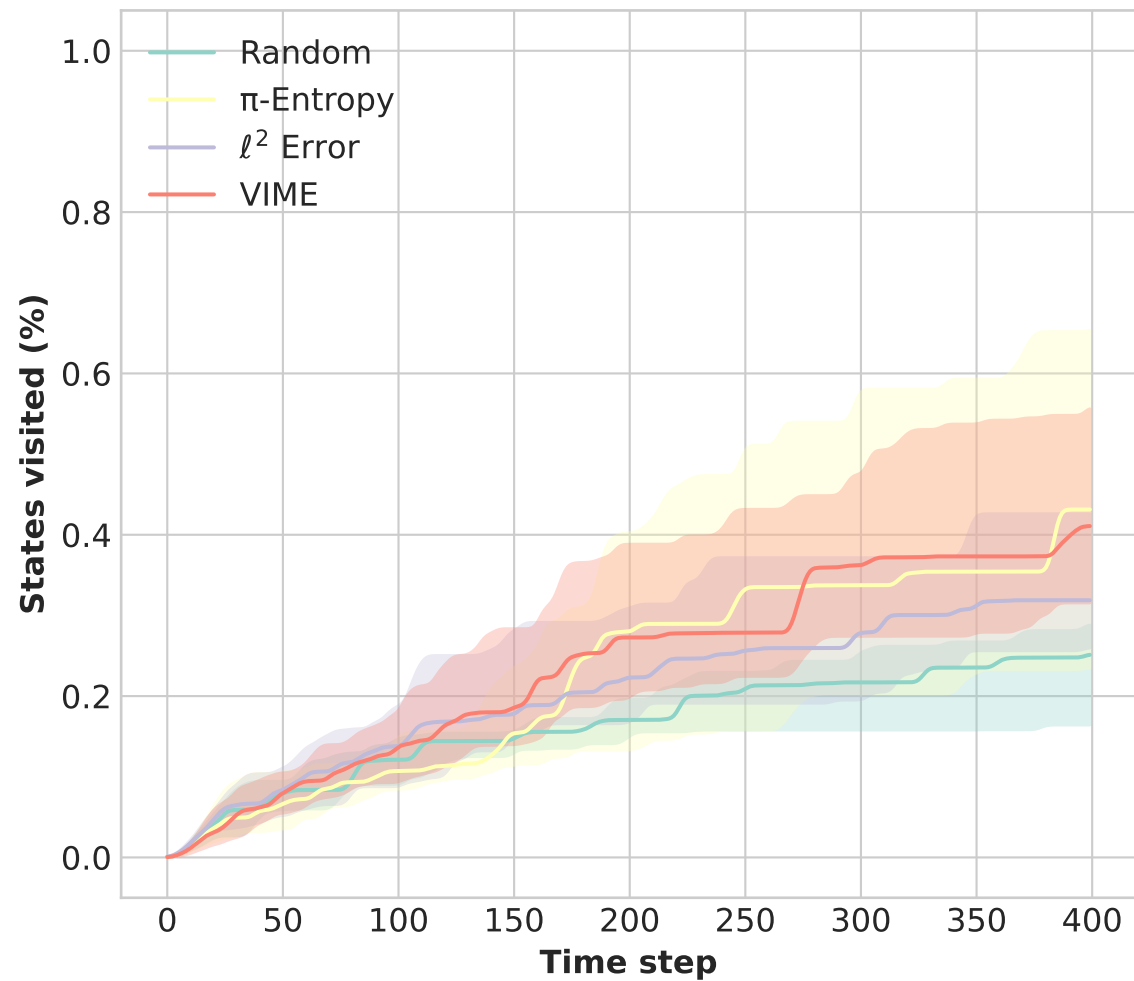

## Active

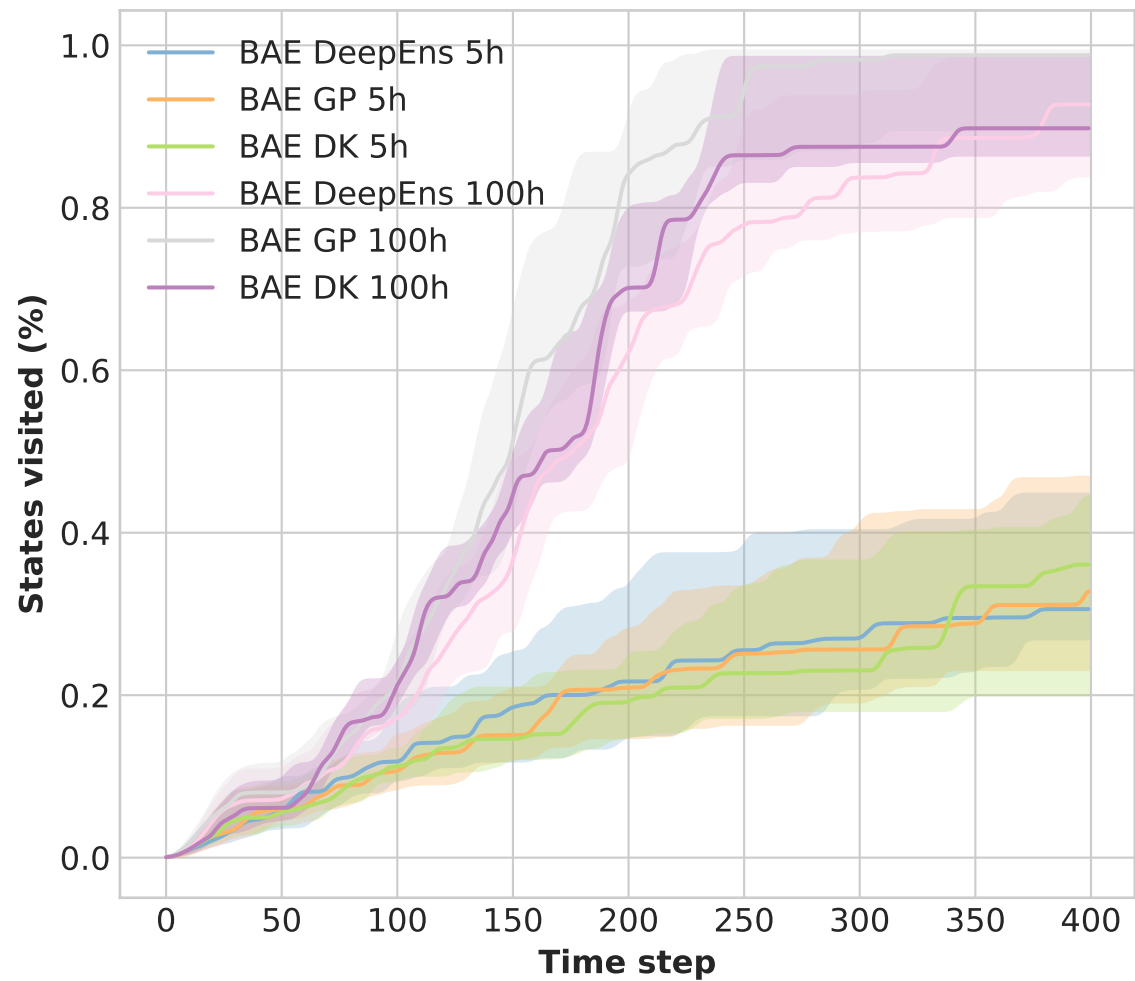

Supplement: supplementary_material [file attachment]
